# Supplementary material for: Microbiota Composition of Breast Milk from Women of Different Ethnicity from the Manawatu—Wanganui Region of New Zealand
Source: PubMed Central journal article supplement (PMC7353441; doi:10.3390/nu12061756), 2020-06-11
Supplement: nutrients-12-01756-s001.pdf [file nutrients-12-01756-s001.pdf]

## Supplementary material

**Table S1.** Demographics and baseline characteristics of the study participants.

| Baseline characteristics             | Mean        | Range     |
|--------------------------------------|-------------|-----------|
| Mothers ( <i>n</i> = 78)             |             |           |
| Age (years)                          | 31 ± 5      | 19–42     |
| Weight (kg)                          | 74 ± 14     | 48–109    |
| Height (m)                           | 1.65 ± 0.06 | 1.52–1.87 |
| Body mass index (kg/m <sup>2</sup> ) | 27 ± 5      | 20–39     |
| Babies ( <i>n</i> = 79)              |             |           |
| Birth weight (kg)                    | 3.6 ± 0.5   | 2.4–4.6   |
| Weight at sample collection (kg)     | 4.8 ± 0.6   | 3.3–6.2   |

Data expressed as mean ± standard deviation.

**Table S2.** Demographics and baseline characteristics of the study participants according to ethnicity.

|                                      | Asian                   | Māori & Pacific Island  | New Zealand European    | <i>p</i> value |
|--------------------------------------|-------------------------|-------------------------|-------------------------|----------------|
| Participants in group ( <i>n</i> )   | 8                       | 17                      | 53                      |                |
| Age (years)                          | 30.4 ± 1.2              | 31.2 ± 1.5              | 30.7 ± 0.7              | 0.917          |
| Weight (kg)                          | 58.4 ± 3.1 <sup>a</sup> | 80.8 ± 4.2 <sup>b</sup> | 74.5 ± 1.6 <sup>b</sup> | <0.001         |
| Height (m)                           | 1.61 ± 0.02             | 1.65 ± 0.01             | 1.66 ± 0.01             | 0.162          |
| Body mass index (kg/m <sup>2</sup> ) | 22.5 ± 1.1 <sup>a</sup> | 29.6 ± 1.5 <sup>b</sup> | 27.2 ± 0.6 <sup>b</sup> | 0.003          |
| Birth weight (kg)                    | 3.32 ± 0.13             | 3.63 ± 0.13             | 3.60 ± 0.06             | 0.255          |

Data expressed as mean ± standard error of the mean. Mean values with a different letter differ significantly, *p* < 0.05.

**Table S3.** World Health Organization and New Zealand Ministry of Health classifications of body mass index (kg/m<sup>2</sup>).

|             | World Health Organisation <sup>1</sup> | New Zealand Ministry of Health <sup>2</sup> |                        |                      |
|-------------|----------------------------------------|---------------------------------------------|------------------------|----------------------|
|             | All populations                        | Asian                                       | Māori & Pacific Island | New Zealand European |
| Underweight | <18.50                                 | <18.50                                      | <18.50                 | <18.50               |
| Normal      | 18.50-24.99                            | 18.5-22.9                                   | 18.5-26                | 18.5-25              |
| Overweight  | ≥25.00                                 | 23-27.4                                     | 26-32                  | 25-30                |
| Obese       | ≥30.00                                 | >27.5                                       | >32                    | >30                  |

<sup>1</sup> Adapted from World Health Organization [1]. <sup>2</sup> Ministry of Health, New Zealand [2].

**Table S4.** Demographics and baseline characteristics of the study participants according to body mass index (BMI) classifications outlined by Ministry of Health, New Zealand.

|                                           | Normal                  | Overweight              | Obese                   | <i>p</i> value |
|-------------------------------------------|-------------------------|-------------------------|-------------------------|----------------|
| Age (years)                               | 30.3 ± 1.0              | 31.5 ± 0.8              | 30.2 ± 1.4              | 0.559          |
| Weight (kg)                               | 60.4 ± 1.2 <sup>a</sup> | 74.7 ± 1.7 <sup>b</sup> | 92.0 ± 2.0 <sup>c</sup> | <0.001         |
| Height (cm)                               | 165.0 ± 1.4             | 165.2 ± 1.0             | 164.6 ± 1.1             | 0.943          |
| Baby's weight (kg)                        | 3.52 ± 0.08             | 3.65 ± 0.09             | 3.54 ± 0.14             | 0.592          |
| Participants in BMI category ( <i>n</i> ) | 27                      | 31                      | 20                      |                |

Data expressed as mean ± standard error of the mean. Mean values with a different letter differ significantly, *p* < 0.05.

**Table S5.** Relative abundance of bacteria at genus level in mother's breast milk categorized by body mass index.

|                              | Normal      | Overweight  | Obese        | Benjamini-Hochberg adjusted <i>p</i> value |
|------------------------------|-------------|-------------|--------------|--------------------------------------------|
| <i>Actinomyces</i>           | 0.05 ± 0.04 | 0.76 ± 0.43 | 0.31 ± 0.12  | 0.760                                      |
| <i>Agrobacterium</i>         | 0.71 ± 0.43 | 1.20 ± 1.09 | 0.06 ± 0.03  | 0.963                                      |
| <i>Akkermansia</i>           | 1.96 ± 0.52 | 1.86 ± 0.39 | 1.63 ± 0.57  | 0.839                                      |
| <i>Anaerococcus</i>          | 0.45 ± 0.27 | 0.10 ± 0.07 | 0.08 ± 0.05  | 0.760                                      |
| <i>Anaerostipes</i>          | 0.06 ± 0.06 | 0           | 0.08 ± 0.08  | 0.964                                      |
| <i>Atopobium</i>             | 0.01 ± 0.00 | 0.30 ± 0.19 | 0.74 ± 0.48  | 0.760                                      |
| <i>Bacteroidales_S24_7</i>   | 0.01 ± 0.00 | 0.04 ± 0.02 | 0.10 ± 0.06  | 0.760                                      |
| <i>Bacteroides</i>           | 3.07 ± 0.81 | 2.05 ± 0.51 | 3.44 ± 0.87  | 0.760                                      |
| <i>Barnesiellaceae</i>       | 0.05 ± 0.05 | 0.04 ± 0.02 | 0.08 ± 0.05  | 0.760                                      |
| <i>Bifidobacteriaceae</i>    | 0.09 ± 0.08 | 0.06 ± 0.03 | 0.17 ± 0.16  | 0.760                                      |
| <i>Bifidobacterium</i>       | 6.94 ± 1.25 | 7.52 ± 0.98 | 7.63 ± 1.99  | 0.839                                      |
| <i>Blautia</i>               | 2.60 ± 0.49 | 2.70 ± 0.38 | 2.39 ± 0.43  | 0.963                                      |
| <i>Brevundimonas</i>         | 0.40 ± 0.40 | 0           | 0.13 ± 0.12  | 0.760                                      |
| <i>Caulobacteraceae</i>      | 1.41 ± 0.56 | 1.31 ± 0.79 | 0.66 ± 0.55  | 0.760                                      |
| <i>Christensenella</i>       | 0.08 ± 0.08 | 0           | 0            | 0.760                                      |
| <i>Christensenellaceae</i>   | 0.42 ± 0.15 | 0.20 ± 0.06 | 0.23 ± 0.08  | 0.936                                      |
| <i>Chryseobacterium</i>      | 2.03 ± 1.65 | 3.88 ± 2.13 | 0.11 ± 0.07  | 0.760                                      |
| <i>Clostridiaceae</i>        | 1.01 ± 0.27 | 1.01 ± 0.22 | 0.85 ± 0.26  | 0.839                                      |
| <i>Clostridiaceae_Other</i>  | 0.10 ± 0.06 | 0.19 ± 0.07 | 0.17 ± 0.09  | 0.760                                      |
| <i>Clostridiales</i>         | 2.86 ± 0.59 | 3.40 ± 0.59 | 2.61 ± 0.45  | 0.839                                      |
| <i>Clostridiales_Other</i>   | 0.46 ± 0.17 | 0.57 ± 0.13 | 0.52 ± 0.16  | 0.760                                      |
| <i>Clostridium</i>           | 1.03 ± 0.42 | 1.47 ± 0.58 | 0.78 ± 0.38  | 0.760                                      |
| <i>Collinsella</i>           | 1.30 ± 0.29 | 1.07 ± 0.18 | 1.13 ± 0.21  | 0.970                                      |
| <i>Coprococcus</i>           | 1.58 ± 0.45 | 1.93 ± 0.32 | 1.91 ± 0.55  | 0.805                                      |
| <i>Coriobacteriaceae</i>     | 0.36 ± 0.11 | 0.38 ± 0.12 | 0.29 ± 0.14  | 0.760                                      |
| <i>Corynebacterium</i>       | 2.01 ± 0.63 | 2.21 ± 0.83 | 7.32 ± 3.20  | 0.760                                      |
| <i>Dorea</i>                 | 1.09 ± 0.50 | 0.59 ± 0.17 | 0.41 ± 0.21  | 0.760                                      |
| <i>Elizabethkingia</i>       | 4.80 ± 3.32 | 0           | 0.056 ± 0.03 | 0.760                                      |
| <i>Enterobacteriaceae</i>    | 0.05 ± 0.04 | 0.09 ± 0.07 | 0.42 ± 0.32  | 0.760                                      |
| <i>Epulopiscium</i>          | 0           | 0.03 ± 0.03 | 0            | 0.760                                      |
| <i>Faecalibacterium</i>      | 0.96 ± 0.21 | 1.21 ± 0.24 | 0.83 ± 0.22  | 0.848                                      |
| <i>Finegoldia</i>            | 0.20 ± 0.13 | 0.10 ± 0.08 | 0.05 ± 0.03  | 0.760                                      |
| <i>Fusobacterium</i>         | 0.51 ± 0.29 | 0.61 ± 0.31 | 0.50 ± 0.24  | 0.760                                      |
| <i>Lachnospira</i>           | 1.04 ± 0.42 | 1.15 ± 0.26 | 0.62 ± 0.19  | 0.760                                      |
| <i>Lachnospiraceae</i>       | 5.07 ± 1.18 | 6.38 ± 1.11 | 4.31 ± 0.96  | 0.839                                      |
| <i>Lachnospiraceae_Other</i> | 0.45 ± 0.22 | 0.35 ± 0.11 | 0.59 ± 0.16  | 0.760                                      |
| <i>Leucobacter</i>           | 0.51 ± 0.45 | 0           | 0            | 0.760                                      |
| <i>Micrococcaceae</i>        | 0.08 ± 0.08 | 0           | 0            | 0.760                                      |
| <i>Micrococcus</i>           | 0.11 ± 0.10 | 0.03 ± 0.02 | 0            | 0.760                                      |
| <i>Mogibacteriaceae</i>      | 0.18 ± 0.14 | 0.05 ± 0.03 | 0.01 ± 0.01  | 0.760                                      |
| <i>Odoribacter</i>           | 0.07 ± 0.07 | 0           | 0            | 0.760                                      |
| <i>Oscillospira</i>          | 0.75 ± 0.25 | 0.46 ± 0.13 | 0.56 ± 0.18  | 0.998                                      |
| <i>Parabacteroides</i>       | 0.25 ± 0.10 | 0.29 ± 0.14 | 0.36 ± 0.11  | 0.760                                      |
| <i>Peptostreptococcus</i>    | 0.40 ± 0.23 | 0.27 ± 0.12 | 0.22 ± 0.14  | 0.998                                      |
| <i>Porphyromonas</i>         | 0.04 ± 0.03 | 0.21 ± 0.15 | 0.04 ± 0.04  | 0.760                                      |
| <i>Prevotella</i>            | 0.03 ± 0.02 | 0.36 ± 0.22 | 0.19 ± 0.11  | 0.760                                      |
| <i>Propionibacterium</i>     | 0.44 ± 0.17 | 1.58 ± 1.40 | 0.48 ± 0.19  | 0.760                                      |
| <i>Pseudomonas</i>           | 0.99 ± 0.82 | 0.13 ± 0.08 | 4.56 ± 2.57  | 0.760                                      |
| <i>Rikenellaceae</i>         | 2.72 ± 1.04 | 2.57 ± 1.02 | 4.17 ± 1.30  | 0.760                                      |
| <i>Roseburia</i>             | 0.41 ± 0.13 | 0.63 ± 0.18 | 0.38 ± 0.17  | 0.760                                      |
| <i>Rothia</i>                | 1.47 ± 0.59 | 1.84 ± 1.14 | 2.30 ± 1.11  | 0.760                                      |
| <i>Ruminococcaceae</i>       | 11.4 ± 2.23 | 13.4 ± 2.09 | 9.73 ± 1.93  | 0.760                                      |
| [ <i>Ruminococcus</i> ]      | 0.65 ± 0.24 | 1.49 ± 0.53 | 0.61 ± 0.22  | 0.760                                      |
| <i>Ruminococcus</i>          | 1.56 ± 0.36 | 2.46 ± 0.49 | 1.40 ± 0.34  | 0.760                                      |

|                     |             |             |             |       |
|---------------------|-------------|-------------|-------------|-------|
| <i>Sphingobium</i>  | 1.21 ± 0.84 | 0.35 ± 0.11 | 0.16 ± 0.05 | 0.839 |
| <i>Sphingomonas</i> | 0.47 ± 0.18 | 0.28 ± 0.12 | 0.72 ± 0.34 | 0.760 |
| <i>Streptophyta</i> | 0.30 ± 0.16 | 0.22 ± 0.10 | 0.08 ± 0.07 | 0.760 |
| Unassigned          | 1.53 ± 0.32 | 1.64 ± 0.23 | 4.80 ± 1.39 | 0.839 |
| <i>Veillonella</i>  | 0.25 ± 0.12 | 0.19 ± 0.08 | 0.13 ± 0.07 | 0.982 |

Data expressed as mean ± standard error of the mean. Some taxonomy were unable to be identified at the genus level. Square brackets around a genus name indicate a candidate genus.

**Table S6.** Relative abundance of bacteria at genus level in mother's feces categorized according to the body mass index.

|                              | Normal       | Overweight  | Obese       | Benjamini-Hochberg adjusted <i>p</i> value |
|------------------------------|--------------|-------------|-------------|--------------------------------------------|
| <i>Actinomyces</i>           | 0.022 ± 0.02 | 0           | 0           | 0.938                                      |
| <i>Agrobacterium</i>         | 0            | 0.07 ± 0.07 | 0           | 0.938                                      |
| <i>Akkermansia</i>           | 2.26 ± 0.91  | 3.74 ± 1.58 | 2.24 ± 0.83 | 0.938                                      |
| <i>Anaerococcus</i>          | 0            | 0.05 ± 0.05 | 0           | 0.978                                      |
| <i>Anaerostipes</i>          | 0.05 ± 0.02  | 0.09 ± 0.06 | 0.09 ± 0.03 | 0.938                                      |
| <i>Bacteroidales</i>         | 0.39 ± 0.27  | 0           | 0           | 0.938                                      |
| <i>Bacteroidales_S24_7</i>   | 1.13 ± 0.78  | 0.41 ± 0.31 | 0.15 ± 0.14 | 0.938                                      |
| <i>Bacteroides</i>           | 17.7 ± 3.59  | 15.4 ± 2.92 | 20.5 ± 3.56 | 0.938                                      |
| <i>Barnesiellaceae</i>       | 0.78 ± 0.25  | 1.04 ± 0.31 | 1.03 ± 0.30 | 0.938                                      |
| <i>Bifidobacterium</i>       | 2.12 ± 0.55  | 1.80 ± 0.33 | 2.40 ± 1.20 | 0.938                                      |
| <i>Blautia</i>               | 2.88 ± 0.74  | 2.96 ± 0.45 | 2.27 ± 0.32 | 0.938                                      |
| <i>Butyrivimonas</i>         | 0.14 ± 0.06  | 0.08 ± 0.03 | 0.16 ± 0.10 | 0.938                                      |
| <i>Caulobacteraceae</i>      | 0.15 ± 0.10  | 0.21 ± 0.07 | 0.33 ± 0.18 | 0.967                                      |
| <i>Christensenellaceae</i>   | 0.56 ± 0.14  | 0.68 ± 0.16 | 0.28 ± 0.09 | 0.938                                      |
| <i>Clostridiaceae</i>        | 0.19 ± 0.05  | 0.42 ± 0.10 | 0.56 ± 0.19 | 0.938                                      |
| <i>Clostridiaceae_Other</i>  | 0.03 ± 0.01  | 0.04 ± 0.01 | 0.07 ± 0.06 | 0.938                                      |
| <i>Clostridiales</i>         | 5.28 ± 0.86  | 5.75 ± 0.72 | 3.35 ± 0.62 | 0.938                                      |
| <i>Clostridiales_Other</i>   | 0.59 ± 0.13  | 1.24 ± 0.25 | 0.66 ± 0.10 | 0.938                                      |
| <i>Clostridium</i>           | 0.30 ± 0.05  | 0.35 ± 0.05 | 0.31 ± 0.04 | 0.938                                      |
| <i>Collinsella</i>           | 0.97 ± 0.34  | 0.76 ± 0.13 | 0.53 ± 0.12 | 0.938                                      |
| <i>Coprococcus</i>           | 2.68 ± 0.41  | 3.27 ± 0.70 | 2.25 ± 0.30 | 0.938                                      |
| <i>Coriobacteriaceae</i>     | 0.29 ± 0.08  | 0.42 ± 0.11 | 0.26 ± 0.07 | 0.938                                      |
| <i>Dorea</i>                 | 0.49 ± 0.10  | 1.04 ± 0.28 | 0.60 ± 0.09 | 0.938                                      |
| <i>Eggerthella</i>           | 0.05 ± 0.02  | 0.03 ± 0.01 | 0.08 ± 0.05 | 0.938                                      |
| <i>Enterobacteriaceae</i>    | 0.11 ± 0.07  | 0.07 ± 0.04 | 0           | 0.938                                      |
| <i>Epulopiscium</i>          | 0.21 ± 0.21  | 0           | 0           | 0.938                                      |
| <i>Faecalibacterium</i>      | 1.70 ± 0.43  | 1.42 ± 0.32 | 1.68 ± 0.41 | 0.938                                      |
| <i>Finegoldia</i>            | 0.15 ± 0.05  | 0.19 ± 0.07 | 0.14 ± 0.06 | 0.938                                      |
| <i>Fusobacterium</i>         | 0.01 ± 0.01  | 1.45 ± 1.43 | 0.01 ± 0.01 | 0.938                                      |
| <i>Lachnospira</i>           | 1.89 ± 0.57  | 1.75 ± 0.61 | 1.31 ± 0.63 | 0.938                                      |
| <i>Lachnospiraceae</i>       | 5.11 ± 0.96  | 6.65 ± 1.24 | 7.01 ± 1.25 | 0.938                                      |
| <i>Lachnospiraceae_Other</i> | 0.46 ± 0.09  | 0.52 ± 0.10 | 0.50 ± 0.11 | 0.978                                      |
| <i>Mogibacteriaceae</i>      | 0.04 ± 0.02  | 0.08 ± 0.02 | 0.05 ± 0.03 | 0.938                                      |
| <i>Odoribacter</i>           | 0.13 ± 0.03  | 0.16 ± 0.05 | 0.27 ± 0.09 | 0.938                                      |
| <i>Oscillospira</i>          | 0.89 ± 0.20  | 0.94 ± 0.31 | 0.58 ± 0.12 | 0.941                                      |
| <i>Parabacteroides</i>       | 1.92 ± 0.66  | 1.34 ± 0.36 | 1.61 ± 0.42 | 0.938                                      |
| <i>Paraprevotella</i>        | 0.20 ± 0.16  | 0.13 ± 0.08 | 1.15 ± 0.98 | 0.938                                      |
| <i>Porphyromonas</i>         | 0.04 ± 0.03  | 0.01 ± 0.01 | 0.01 ± 0.01 | 0.938                                      |
| <i>Prevotella</i>            | 3.50 ± 2.03  | 0.50 ± 0.24 | 0.85 ± 0.55 | 0.938                                      |
| <i>Rikenellaceae</i>         | 3.22 ± 0.94  | 3.03 ± 0.63 | 2.94 ± 0.72 | 0.967                                      |
| <i>Rikenellaceae_Other</i>   | 0            | 0.03 ± 0.03 | 0           | 0.938                                      |
| <i>Roseburia</i>             | 0.66 ± 0.53  | 0.59 ± 0.18 | 0.72 ± 0.33 | 0.938                                      |
| <i>Ruminococcaceae</i>       | 22.2 ± 3.80  | 17.6 ± 3.08 | 25.9 ± 4.48 | 0.938                                      |
| [ <i>Ruminococcus</i> ]      | 0.71 ± 0.18  | 1.78 ± 0.86 | 0.71 ± 0.18 | 0.967                                      |
| <i>Ruminococcus</i>          | 0.29 ± 0.81  | 3.79 ± 0.95 | 3.80 ± 0.79 | 0.938                                      |
| <i>Sphingomonas</i>          | 0.03 ± 0.02  | 0.01 ± 0.01 | 0.01 ± 0.01 | 0.938                                      |

|                    |             |             |             |       |
|--------------------|-------------|-------------|-------------|-------|
| <i>Sutterella</i>  | 0.12 ± 0.08 | 0.08 ± 0.07 | 0.02 ± 0.01 | 0.938 |
| Unassigned         | 2.25 ± 0.25 | 2.23 ± 0.22 | 1.86 ± 0.16 | 0.938 |
| <i>Veillonella</i> | 1.26 ± 0.47 | 1.54 ± 0.50 | 2.40 ± 1.48 | 0.980 |

Data expressed as mean ± standard error of the mean. Some taxonomy were unable to be identified at the genus level. Square brackets around a genus name indicate a candidate genus.

**Table S7.** Relative abundance of bacteria at genus level in infant's feces categorized according to the mother's body mass index.

|                               | Normal      | Overweight  | Obese       | Benjamini-Hochberg adjusted <i>p</i> value |
|-------------------------------|-------------|-------------|-------------|--------------------------------------------|
| <i>Actinomyces</i>            | 1.31 ± 1.26 | 0.05 ± 0.03 | 1.67 ± 1.58 | 0.965                                      |
| <i>Agrobacterium</i>          | 0           | 0.12 ± 0.08 | 0.01 ± 0.01 | 0.965                                      |
| <i>Akkermansia</i>            | 0.12 ± 0.11 | 0.05 ± 0.03 | 0.01 ± 0.01 | 0.965                                      |
| <i>Bacteroides</i>            | 19.9 ± 5.39 | 12.4 ± 4.03 | 24.8 ± 7.31 | 0.965                                      |
| <i>Bifidobacterium</i>        | 45.5 ± 6.75 | 52.7 ± 6.29 | 32.8 ± 7.98 | 0.965                                      |
| <i>Blautia</i>                | 0.65 ± 0.44 | 0.32 ± 0.17 | 0.08 ± 0.04 | 0.965                                      |
| <i>Caulobacteraceae</i>       | 0.45 ± 0.45 | 2.59 ± 1.98 | 0.02 ± 0.02 | 0.965                                      |
| <i>Clostridiaceae</i>         | 3.42 ± 2.75 | 3.34 ± 2.11 | 3.41 ± 3.25 | 0.965                                      |
| <i>Clostridiaceae</i> _Other  | 0.03 ± 0.03 | 0.02 ± 0.01 | 0.01 ± 0.00 | 0.965                                      |
| <i>Clostridiales</i>          | 0.78 ± 0.60 | 0.18 ± 0.09 | 0.13 ± 0.05 | 0.965                                      |
| <i>Clostridiales</i> _Other   | 0.09 ± 0.06 | 0.04 ± 0.01 | 0.08 ± 0.04 | 0.965                                      |
| <i>Clostridium</i>            | 5.79 ± 3.48 | 11.8 ± 5.23 | 17.6 ± 8.03 | 0.965                                      |
| <i>Collinsella</i>            | 3.50 ± 1.93 | 1.50 ± 0.55 | 3.12 ± 1.76 | 0.965                                      |
| <i>Coprococcus</i>            | 0.29 ± 0.18 | 0.21 ± 0.11 | 0.08 ± 0.04 | 0.965                                      |
| <i>Coriobacteriaceae</i>      | 0.08 ± 0.05 | 0.79 ± 0.63 | 0.02 ± 0.01 | 0.965                                      |
| <i>Dorea</i>                  | 0.95 ± 0.93 | 0.23 ± 0.19 | 0.10 ± 0.08 | 0.988                                      |
| <i>Eggerthella</i>            | 0.19 ± 0.10 | 0.05 ± 0.02 | 0.12 ± 0.07 | 0.965                                      |
| <i>Enterobacteriaceae</i>     | 0.25 ± 0.08 | 0.40 ± 0.12 | 0.36 ± 0.11 | 0.965                                      |
| <i>Faecalibacterium</i>       | 0.09 ± 0.06 | 0.06 ± 0.04 | 0.02 ± 0.01 | 0.965                                      |
| <i>Finegoldia</i>             | 0.05 ± 0.05 | 0.02 ± 0.01 | 0.02 ± 0.02 | 0.965                                      |
| <i>Fusobacterium</i>          | 0.65 ± 0.64 | 0.02 ± 0.01 | 0.01 ± 0.01 | 0.965                                      |
| <i>Lachnospiraceae</i>        | 1.49 ± 0.59 | 0.25 ± 0.12 | 2.11 ± 1.41 | 0.965                                      |
| <i>Lachnospiraceae</i> _Other | 0.07 ± 0.02 | 0.03 ± 0.01 | 1.78 ± 1.72 | 0.965                                      |
| <i>Megasphaera</i>            | 0           | 0.19 ± 0.14 | 0.10 ± 0.10 | 0.965                                      |
| <i>Odoribacter</i>            | 0.09 ± 0.09 | 0.04 ± 0.04 | 0           | 0.965                                      |
| <i>Oscillospira</i>           | 0.33 ± 0.19 | 0.08 ± 0.07 | 0.27 ± 0.25 | 0.965                                      |
| <i>Parabacteroides</i>        | 1.71 ± 0.89 | 3.44 ± 2.29 | 0.99 ± 0.54 | 0.965                                      |
| <i>Peptostreptococcus</i>     | 0.06 ± 0.05 | 0.01 ± 0.01 | 0.11 ± 0.11 | 0.965                                      |
| <i>Porphyromonas</i>          | 0           | 0           | 0.15 ± 0.14 | 0.965                                      |
| <i>Prevotella</i>             | 0.05 ± 0.02 | 0.02 ± 0.01 | 0.26 ± 0.22 | 0.965                                      |
| <i>Pseudoramibacter</i>       | 0           | 0.16 ± 0.13 | 0           | 0.965                                      |
| <i>Rikenellaceae</i>          | 0.59 ± 0.33 | 0.36 ± 0.24 | 0.04 ± 0.03 | 0.965                                      |
| <i>Ruminococcaceae</i>        | 0.95 ± 0.44 | 2.27 ± 1.62 | 0.15 ± 0.04 | 0.979                                      |
| [ <i>Ruminococcus</i> ]       | 3.89 ± 1.64 | 0.76 ± 0.36 | 5.35 ± 4.56 | 0.965                                      |
| <i>Ruminococcus</i>           | 0.21 ± 0.13 | 0.18 ± 0.10 | 0.09 ± 0.03 | 0.965                                      |
| <i>Sphingomonas</i>           | 0.50 ± 0.49 | 0.02 ± 0.02 | 0           | 0.965                                      |
| Unassigned                    | 2.70 ± 0.42 | 2.70 ± 0.48 | 2.43 ± 0.49 | 0.965                                      |
| <i>Veillonella</i>            | 0.40 ± 0.26 | 0.40 ± 0.25 | 0.30 ± 0.18 | 0.979                                      |

Data expressed as mean ± standard error of the mean. Some taxonomy were unable to be identified at the genus level. Square brackets around a genus name indicate a candidate genus.

**Table S8.** Relative abundance of bacteria at genus level in mother's breast milk categorized according to the mode of delivery.

|                              | Cesarean    | Vaginal     | Benjamini-Hochberg adjusted <i>p</i> value |
|------------------------------|-------------|-------------|--------------------------------------------|
| <i>Actinomyces</i>           | 0.10 ± 0.05 | 0.46 ± 0.22 | 1.000                                      |
| <i>Agrobacterium</i>         | 0.05 ± 0.04 | 0.88 ± 0.55 | 1.000                                      |
| <i>Akkermansia</i>           | 1.77 ± 0.69 | 1.85 ± 0.30 | 1.000                                      |
| <i>Anaerococcus</i>          | 0.03 ± 0.03 | 0.26 ± 0.12 | 1.000                                      |
| <i>Anaerostipes</i>          | 0           | 0.05 ± 0.04 | 1.000                                      |
| <i>Atopobium</i>             | 0.09 ± 0.07 | 0.36 ± 0.18 | 1.000                                      |
| <i>Bacteroidales_S24_7</i>   | 0.03 ± 0.02 | 0.05 ± 0.02 | 1.000                                      |
| <i>Bacteroides</i>           | 1.59 ± 0.57 | 3.03 ± 0.49 | 1.000                                      |
| <i>Barnesiellaceae</i>       | 0           | 0.06 ± 0.03 | 1.000                                      |
| <i>Bifidobacteriaceae</i>    | 0.19 ± 0.15 | 0.08 ± 0.05 | 1.000                                      |
| <i>Bifidobacterium</i>       | 7.79 ± 2.87 | 7.25 ± 0.71 | 1.000                                      |
| <i>Blautia</i>               | 2.00 ± 0.54 | 2.71 ± 0.28 | 1.000                                      |
| <i>Brevundimonas</i>         | 0           | 0.21 ± 0.17 | 1.000                                      |
| <i>Caulobacteraceae</i>      | 1.94 ± 1.53 | 1.01 ± 0.34 | 1.000                                      |
| <i>Christensenella</i>       | 0           | 0.03 ± 0.03 | 1.000                                      |
| <i>Christensenellaceae</i>   | 0.18 ± 0.10 | 0.31 ± 0.07 | 1.000                                      |
| <i>Chryseobacterium</i>      | 3.39 ± 3.11 | 2.00 ± 1.04 | 1.000                                      |
| <i>Clostridiaceae</i>        | 0.71 ± 0.27 | 1.03 ± 0.17 | 1.000                                      |
| <i>Clostridiaceae_Other</i>  | 0.16 ± 0.11 | 0.15 ± 0.05 | 1.000                                      |
| <i>Clostridiales</i>         | 2.78 ± 0.77 | 3.06 ± 0.37 | 1.000                                      |
| <i>Clostridiales_Other</i>   | 0.43 ± 0.19 | 0.54 ± 0.10 | 1.000                                      |
| <i>Clostridium</i>           | 0.67 ± 0.35 | 1.24 ± 0.34 | 1.000                                      |
| <i>Collinsella</i>           | 1.17 ± 0.29 | 1.17 ± 0.15 | 1.000                                      |
| <i>Coprococcus</i>           | 2.03 ± 0.59 | 1.75 ± 0.24 | 1.000                                      |
| <i>Coriobacteriaceae</i>     | 0.15 ± 0.07 | 0.39 ± 0.08 | 1.000                                      |
| <i>Corynebacterium</i>       | 4.15 ± 3.75 | 3.32 ± 0.82 | 1.000                                      |
| <i>Dorea</i>                 | 0.39 ± 0.15 | 0.79 ± 0.24 | 1.000                                      |
| <i>Elizabethkingia</i>       | 0.04 ± 0.03 | 2.07 ± 1.44 | 1.000                                      |
| <i>Enterobacteriaceae</i>    | 0.61 ± 0.46 | 0.06 ± 0.03 | 1.000                                      |
| <i>Epulopiscium</i>          | 0           | 0.02 ± 0.01 | 1.000                                      |
| <i>Faecalibacterium</i>      | 1.21 ± 0.44 | 0.98 ± 0.13 | 1.000                                      |
| <i>Finegoldia</i>            | 0           | 0.15 ± 0.07 | 1.000                                      |
| <i>Fusobacterium</i>         | 0.66 ± 0.41 | 0.52 ± 0.19 | 1.000                                      |
| <i>Lachnospira</i>           | 0.89 ± 0.43 | 0.99 ± 0.21 | 1.000                                      |
| <i>Lachnospiraceae</i>       | 5.28 ± 1.49 | 5.41 ± 0.72 | 1.000                                      |
| <i>Lachnospiraceae_Other</i> | 0.35 ± 0.16 | 0.47 ± 0.11 | 1.000                                      |
| <i>Leucobacter</i>           | 0.86 ± 0.86 | 0.03 ± 0.03 | 1.000                                      |
| <i>Micrococcaceae</i>        | 0           | 0.04 ± 0.04 | 1.000                                      |
| <i>Micrococcus</i>           | 0.02 ± 0.02 | 0.06 ± 0.05 | 1.000                                      |
| <i>Mogibacteriaceae</i>      | 0           | 0.10 ± 0.06 | 1.000                                      |
| <i>Odoribacter</i>           | 0           | 0.03 ± 0.03 | 1.000                                      |
| <i>Oscillospira</i>          | 0.68 ± 0.27 | 0.57 ± 0.12 | 1.000                                      |
| <i>Parabacteroides</i>       | 0.19 ± 0.12 | 0.32 ± 0.08 | 1.000                                      |
| <i>Peptostreptococcus</i>    | 0.03 ± 0.02 | 0.36 ± 0.12 | 1.000                                      |
| <i>Porphyromonas</i>         | 0.06 ± 0.06 | 0.11 ± 0.07 | 1.000                                      |
| <i>Prevotella</i>            | 0.13 ± 0.08 | 0.22 ± 0.11 | 1.000                                      |
| <i>Propionibacterium</i>     | 0.12 ± 0.05 | 1.06 ± 0.67 | 1.000                                      |
| <i>Pseudomonas</i>           | 1.18 ± 1.01 | 1.68 ± 0.88 | 1.000                                      |
| <i>Rikenellaceae</i>         | 2.28 ± 1.12 | 3.20 ± 0.73 | 1.000                                      |
| <i>Roseburia</i>             | 0.40 ± 0.20 | 0.51 ± 0.11 | 1.000                                      |
| <i>Rothia</i>                | 0.46 ± 0.17 | 2.13 ± 0.68 | 1.000                                      |
| <i>Ruminococcaceae</i>       | 13.0 ± 3.48 | 11.5 ± 1.31 | 1.000                                      |
| [ <i>Ruminococcus</i> ]      | 1.68 ± 1.06 | 0.81 ± 0.17 | 1.000                                      |
| <i>Ruminococcus</i>          | 2.32 ± 0.87 | 1.77 ± 0.24 | 1.000                                      |

|                     |             |             |       |
|---------------------|-------------|-------------|-------|
| <i>Sphingobium</i>  | 0.77 ± 0.51 | 0.57 ± 0.35 | 1.000 |
| <i>Sphingomonas</i> | 0.64 ± 0.36 | 0.42 ± 0.12 | 1.000 |
| <i>Streptophyta</i> | 0.05 ± 0.05 | 0.24 ± 0.08 | 1.000 |
| Unassigned          | 2.99 ± 1.40 | 2.30 ± 0.41 | 1.000 |
| <i>Veillonella</i>  | 0.23 ± 0.19 | 0.20 ± 0.05 | 1.000 |

Data expressed as mean ± standard error of the mean. Some taxonomy were unable to be identified at the genus level. Square brackets around a genus name indicate a candidate genus.

**Table S9.** Relative abundance of bacteria at genus level in mother's feces categorized according to the mode of delivery.

|                              | Cesarean    | Vaginal     | Benjamini-Hochberg adjusted <i>p</i> value |
|------------------------------|-------------|-------------|--------------------------------------------|
| <i>Actinomyces</i>           | 0           | 0.01 ± 0.01 | 0.935                                      |
| <i>Agrobacterium</i>         | 0           | 0.04 ± 0.04 | 0.935                                      |
| <i>Akkermansia</i>           | 2.86 ± 1.23 | 2.83 ± 0.84 | 0.935                                      |
| <i>Anaerococcus</i>          | 0           | 0.03 ± 0.03 | 0.935                                      |
| <i>Anaerostipes</i>          | 0.19 ± 0.13 | 0.05 ± 0.01 | 0.935                                      |
| <i>Bacteroidales</i>         | 0           | 0.17 ± 0.12 | 0.964                                      |
| <i>Bacteroidales_S24_7</i>   | 0.85 ± 0.66 | 0.54 ± 0.34 | 0.935                                      |
| <i>Bacteroides</i>           | 16.8 ± 3.70 | 17.7 ± 2.21 | 0.935                                      |
| <i>Barnesiellaceae</i>       | 0.73 ± 0.25 | 0.99 ± 0.20 | 0.964                                      |
| <i>Bifidobacterium</i>       | 1.60 ± 0.57 | 2.17 ± 0.45 | 0.935                                      |
| <i>Blautia</i>               | 3.34 ± 0.92 | 2.63 ± 0.34 | 0.935                                      |
| <i>Butyrivimonas</i>         | 0.04 ± 0.02 | 0.14 ± 0.04 | 0.935                                      |
| <i>Caulobacteraceae</i>      | 0.37 ± 0.24 | 0.19 ± 0.06 | 0.935                                      |
| <i>Christensenellaceae</i>   | 0.38 ± 0.16 | 0.56 ± 0.10 | 0.935                                      |
| <i>Clostridiaceae</i>        | 0.62 ± 0.22 | 0.32 ± 0.06 | 0.935                                      |
| <i>Clostridiaceae_Other</i>  | 0.03 ± 0.02 | 0.05 ± 0.02 | 0.935                                      |
| <i>Clostridiales</i>         | 5.03 ± 1.09 | 4.95 ± 0.50 | 0.973                                      |
| <i>Clostridiales_Other</i>   | 1.29 ± 0.47 | 0.76 ± 0.10 | 0.935                                      |
| <i>Clostridium</i>           | 0.43 ± 0.08 | 0.29 ± 0.03 | 0.935                                      |
| <i>Collinsella</i>           | 0.52 ± 0.11 | 0.83 ± 0.16 | 0.935                                      |
| <i>Coprococcus</i>           | 2.73 ± 0.45 | 2.82 ± 0.38 | 0.935                                      |
| <i>Coriobacteriaceae</i>     | 0.41 ± 0.11 | 0.33 ± 0.06 | 0.935                                      |
| <i>Dorea</i>                 | 0.79 ± 0.19 | 0.72 ± 0.14 | 0.935                                      |
| <i>Eggerthella</i>           | 0.03 ± 0.01 | 0.06 ± 0.02 | 0.964                                      |
| <i>Enterobacteriaceae</i>    | 0.01 ± 0.00 | 0.08 ± 0.04 | 0.935                                      |
| <i>Epulopiscium</i>          | 0           | 0.09 ± 0.09 | 0.935                                      |
| <i>Faecalibacterium</i>      | 1.93 ± 0.57 | 1.51 ± 0.24 | 0.935                                      |
| <i>Finegoldia</i>            | 0.12 ± 0.07 | 0.17 ± 0.04 | 0.935                                      |
| <i>Fusobacterium</i>         | 0           | 0.70 ± 0.68 | 0.935                                      |
| <i>Lachnospira</i>           | 1.77 ± 0.84 | 1.67 ± 0.38 | 0.935                                      |
| <i>Lachnospiraceae</i>       | 9.68 ± 2.14 | 5.43 ± 0.64 | 0.935                                      |
| <i>Lachnospiraceae_Other</i> | 0.70 ± 0.17 | 0.45 ± 0.06 | 0.935                                      |
| <i>Mogibacteriaceae</i>      | 0.04 ± 0.02 | 0.06 ± 0.02 | 0.935                                      |
| <i>Odoribacter</i>           | 0.17 ± 0.05 | 0.18 ± 0.04 | 0.964                                      |
| <i>Oscillospira</i>          | 0.65 ± 0.14 | 0.87 ± 0.17 | 0.964                                      |
| <i>Parabacteroides</i>       | 1.05 ± 0.32 | 1.74 ± 0.35 | 0.935                                      |
| <i>Paraprevotella</i>        | 0.23 ± 0.17 | 0.46 ± 0.32 | 0.935                                      |
| <i>Porphyromonas</i>         | 0.01 ± 0.01 | 0.03 ± 0.01 | 0.935                                      |
| <i>Prevotella</i>            | 1.13 ± 0.79 | 1.76 ± 0.89 | 0.997                                      |
| <i>Rikenellaceae</i>         | 3.78 ± 0.96 | 2.92 ± 0.50 | 0.935                                      |
| <i>Rikenellaceae_Other</i>   | 0           | 0.02 ± 0.01 | 0.964                                      |
| <i>Roseburia</i>             | 0.53 ± 0.27 | 0.68 ± 0.26 | 0.935                                      |
| <i>Ruminococcaceae</i>       | 18.0 ± 3.75 | 22.1 ± 2.48 | 0.935                                      |
| [ <i>Ruminococcus</i> ]      | 1.22 ± 0.52 | 1.11 ± 0.41 | 0.935                                      |
| <i>Ruminococcus</i>          | 5.61 ± 1.51 | 3.01 ± 0.51 | 0.935                                      |
| <i>Sphingomonas</i>          | 0.02 ± 0.01 | 0.02 ± 0.01 | 0.935                                      |

|                    |             |             |       |
|--------------------|-------------|-------------|-------|
| <i>Sutterella</i>  | 0.17 ± 0.14 | 0.06 ± 0.03 | 0.935 |
| Unassigned         | 2.19 ± 0.26 | 2.13 ± 0.15 | 0.935 |
| <i>Veillonella</i> | 2.76 ± 1.95 | 1.42 ± 0.36 | 0.964 |

Data expressed as mean ± standard error of the mean. Some taxonomy were unable to be identified at the genus level. Square brackets around a genus name indicate a candidate genus.

**Table S10.** Relative abundance of bacteria in infant's feces at genus level categorized according to the mode of delivery.

|                              | <b>Cesarean</b> | <b>Vaginal</b> | <b>Benjamini-Hochberg adjusted <i>p</i> value</b> |
|------------------------------|-----------------|----------------|---------------------------------------------------|
| <i>Actinomyces</i>           | 2.74 ± 2.61     | 0.52 ± 0.48    | 0.848                                             |
| <i>Agrobacterium</i>         | 0.13 ± 0.12     | 0.03 ± 0.03    | 0.557                                             |
| <i>Akkermansia</i>           | 0.08 ± 0.07     | 0.06 ± 0.05    | 0.848                                             |
| <i>Anaerotruncus</i>         | 0               | 0.02 ± 0.02    | 0.848                                             |
| <i>Bacteroides</i>           | 6.28 ± 5.38     | 20.6 ± 3.51    | 0.104                                             |
| <i>Bifidobacterium</i>       | 41.7 ± 10.8     | 45.9 ± 4.36    | 0.848                                             |
| <i>Blautia</i>               | 0.98 ± 0.88     | 0.25 ± 0.10    | 0.850                                             |
| <i>Caulobacteraceae</i>      | 0.15 ± 0.15     | 1.40 ± 0.96    | 0.614                                             |
| <i>Clostridiaceae</i>        | 6.13 ± 4.77     | 2.82 ± 1.53    | 0.104                                             |
| <i>Clostridiaceae_Other</i>  | 0.01 ± 0.01     | 0.02 ± 0.01    | 0.848                                             |
| <i>Clostridiales</i>         | 0.18 ± 0.10     | 0.42 ± 0.26    | 0.947                                             |
| <i>Clostridiales_Other</i>   | 0.04 ± 0.02     | 0.06 ± 0.03    | 0.848                                             |
| <i>Clostridium</i>           | 18.6 ± 9.36     | 9.55 ± 3.26    | 0.557                                             |
| <i>Collinsella</i>           | 0.02 ± 0.02*    | 3.15 ± 1.00*   | <0.001                                            |
| <i>Coprococcus</i>           | 0.09 ± 0.06     | 0.23 ± 0.09    | 0.850                                             |
| <i>Coriobacteriaceae</i>     | 0.01 ± 0.01     | 0.42 ± 0.30    | 0.532                                             |
| <i>Dorea</i>                 | 0.52 ± 0.43     | 0.44 ± 0.40    | 0.782                                             |
| <i>Eggerthella</i>           | 0.03 ± 0.02     | 0.14 ± 0.05    | 0.532                                             |
| <i>Enterobacteriaceae</i>    | 0.52 ± 0.16     | 0.30 ± 0.07    | 0.484                                             |
| <i>Faecalibacterium</i>      | 0.11 ± 0.08     | 0.05 ± 0.03    | 0.848                                             |
| <i>Finegoldia</i>            | 0               | 0.03 ± 0.02    | 0.490                                             |
| <i>Fusobacterium</i>         | 1.36 ± 1.32     | 0.01 ± 0.01    | 0.312                                             |
| <i>Lachnospiraceae</i>       | 1.41 ± 0.84     | 1.10 ± 0.41    | 0.782                                             |
| <i>Lachnospiraceae_Other</i> | 0.10 ± 0.04     | 0.56 ± 0.52    | 0.490                                             |
| <i>Megasphaera</i>           | 0               | 0.12 ± 0.07    | 0.848                                             |
| <i>Odoribacter</i>           | 0               | 0.06 ± 0.04    | 0.615                                             |
| <i>Oscillospira</i>          | 0.01 ± 0.01     | 0.26 ± 0.12    | 0.848                                             |
| <i>Parabacteroides</i>       | 5.16 ± 5.15     | 1.61 ± 0.51    | 0.615                                             |
| <i>Peptostreptococcus</i>    | 0               | 0.06 ± 0.04    | 0.848                                             |
| <i>Porphyromonas</i>         | 0               | 0.05 ± 0.04    | 0.557                                             |
| <i>Prevotella</i>            | 0.01 ± 0.00     | 0.11 ± 0.07    | 0.848                                             |
| <i>Pseudoramibacter</i>      | 0               | 0.08 ± 0.06    | 0.848                                             |
| <i>Rikenellaceae</i>         | 0.01 ± 0.00     | 0.43 ± 0.18    | 0.850                                             |
| <i>Ruminococcaceae</i>       | 0.73 ± 0.55     | 1.38 ± 0.79    | 0.848                                             |
| [ <i>Ruminococcus</i> ]      | 7.88 ± 6.63     | 2.02 ± 0.75    | 0.507                                             |
| <i>Ruminococcus</i>          | 0.28 ± 0.22     | 0.14 ± 0.06    | 0.848                                             |
| <i>Sphingomonas</i>          | 0               | 0.22 ± 0.21    | 0.848                                             |
| Unassigned                   | 3.05 ± 0.97     | 2.55 ± 0.26    | 0.848                                             |
| <i>Veillonella</i>           | 0.69 ± 0.34     | 0.31 ± 0.15    | 0.532                                             |

Data expressed as mean ± standard error of the mean. Some taxonomy were unable to be identified at the genus level. Square brackets around a genus name indicate a candidate genus. Mean values marked with \* differ significantly,  $p < 0.05$ .

**Table S11.** Summary of immune modulatory proteins analyzed, their potential impact on infant health, and maternal diet and lifestyle influences affecting their concentrations in breast milk.

| <b>Breast milk proteins analyzed</b>  | <b>Potential role</b>                                                                              | <b>Reference</b> |
|---------------------------------------|----------------------------------------------------------------------------------------------------|------------------|
| Interleukin 2                         | Role in T cell differentiation                                                                     | [3]              |
|                                       | Diet can impact the amount present in breast milk                                                  | [4]              |
| Interleukin 4                         | Role in allergies and immunoglobulin (Ig) E production                                             | [5]              |
|                                       | Higher in milk when maternal allergies are present                                                 | [6]              |
|                                       | Higher in mature milk of smokers                                                                   | [7]              |
| Interleukin 6                         | Predominant cytokine in milk                                                                       | [7]              |
|                                       | Has a role in the differentiation of IgA producing cells                                           | [8]              |
|                                       | Higher in mature milk of smokers                                                                   | [7]              |
| Interleukin 7                         | Lower in milk when maternal allergies are present                                                  | [7]              |
|                                       | Regulatory cytokine that can cross the intestinal wall and influence thymic development in infants | [9]              |
| Interleukin 8                         | Role in neutrophil recruitment                                                                     | [10]             |
|                                       | High levels indicate subclinical breast inflammation leading to poor infant growth                 | [11]             |
|                                       | High amounts in mature milk of mothers who had pre-eclampsia                                       | [12]             |
|                                       | Decreased in milk when maternal rhinitis is present                                                |                  |
| Interleukin 10                        | Plays a role in oral tolerance                                                                     |                  |
|                                       | Involved in IgA synthesis                                                                          |                  |
| Interferon $\gamma$                   | Has a critical role in innate and adaptive immunity                                                | [13]             |
|                                       | Recruits macrophages                                                                               | [13]             |
|                                       | Higher in mature milk of smokers                                                                   | [7]              |
|                                       | Increases as milk matures                                                                          | [4]              |
| Insulin-like growth factor 1          | Remains low in infants that develop atopy                                                          | [14]             |
|                                       | High amounts in milk associated with high weight gain in infants                                   | [15]             |
| Transforming growth factor $\beta$ 1  | Promotes functional development of the gastrointestinal mucosa                                     | [16]             |
|                                       | Plays a role in oral tolerance                                                                     | [17]             |
| Transforming growth factor $\beta$ 2  | Predominant cytokine in milk                                                                       | [6]              |
|                                       | Lower in milk when maternal allergies are present                                                  | [18]             |
|                                       | Lower in milk with increased maternal body mass index (BMI), but not significant                   | [19]             |
|                                       | Milk concentrations correlate with maternal polyunsaturated fatty acid consumption                 | [18]             |
| Soluble cluster of differentiation 14 | Enhances cellular response to microbial components                                                 | [20]             |
|                                       | Lower amounts in human milk as it matures                                                          | [19]             |
|                                       | Higher amounts in milk are associated with bifidobacteria and staphylococci                        | [19]             |
|                                       | Low amounts in milk is associated with high BMI                                                    | [19]             |
| Immunoglobulin A                      | Binds microbial antigens                                                                           | [8,19]           |
|                                       | Enhances phagocytosis                                                                              | [8]              |
|                                       | Promotes normal microbial colonization in the gut                                                  | [8]              |



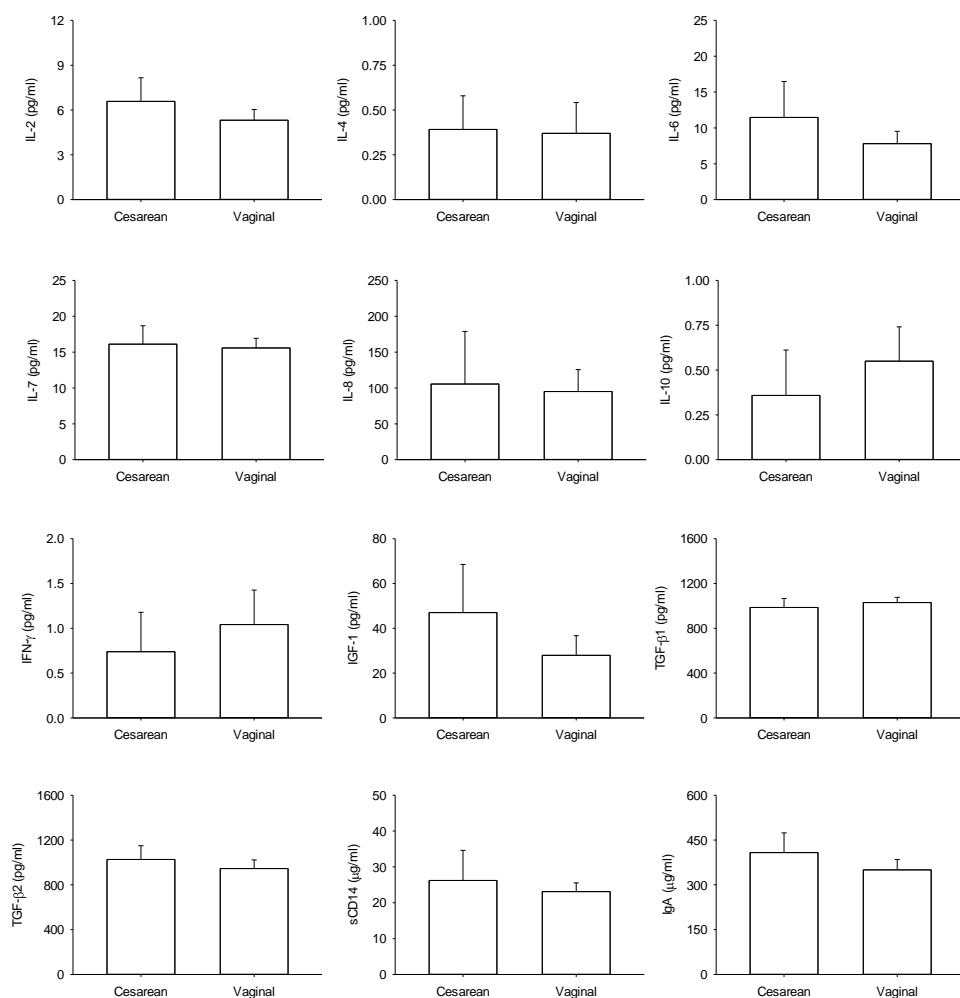

**Figure S1.** Immune related proteins in mother's breast milk categorized according to the mode of delivery of infants. Data expressed as mean  $\pm$  standard error of the mean. IL – Interleukin, IFN – Interferon, IGF – Insulin-like growth factor, TGF – Transforming growth factor, sCD – Soluble cluster of differentiation, Ig – Immunoglobulin.

## References

1. World Health Organization. BMI Classification. In *Global Database on Body Mass Index*, 2006 ed.; World Health Organisation: Geneva, 2006.
2. Ministry of Health. Food and Nutrition Guidelines for Healthy Pregnant and Breastfeeding Women: A background paper. Ministry of Health: Wellington, 2006.
3. Ross, S.H.; Cantrell, D.A. Signaling and Function of Interleukin-2 in T Lymphocytes. *Annual Review of Immunology* **2018**, *36*, 411-433.
4. Hoppu, U.; Isolauri, E.; Laakso, P.; Matomaki, J.; Laitinen, K. Probiotics and dietary counselling targeting maternal dietary fat intake modifies breast milk fatty acids and cytokines. *European Journal of Nutrition* **2012**, *51*, 211-219.
5. Steinke, J.W.; Borish, L. Th2 cytokines and asthma. Interleukin-4: its role in the pathogenesis of asthma, and targeting it for asthma treatment with interleukin-4 receptor antagonists. *Respir Res* **2001**, *2*, 66-70.
6. Bottcher, M.F.; Jenmalm, M.C.; Garofalo, R.P.; Bjorksten, B. Cytokines in breast milk from allergic and nonallergic mothers. *Pediatr. Res.* **2000**, *47*, 157-162.
7. Burch, J.L.; Soto-Ramirez, N.; Karmaus, W. Breast Milk Cytokines and Maternal Allergy. *J. Allergy Clin. Immunol.* **2011**, *127*, AB129.

8. Castellote, C.; Casillas, R.; Ramirez-Santana, C.; Perez-Cano, F.J.; Castell, M.; Gloria Moretones, M.; Lopez-Sabater, M.C.; Franch, A. Premature Delivery Influences the Immunological Composition of Colostrum and Transitional and Mature Human Milk. *J. Nutr.* **2011**, *141*, 1181-1187.
9. Ngom, P.T.; Collinson, A.C.; Pido-Lopez, J.; Henson, S.M.; Prentice, A.M.; Aspinall, R. Improved thymic function in exclusively breastfed infants is associated with higher interleukin 7 concentrations in their mothers' breast milk. *Am. J. Clin. Nutr.* **2004**, *80*, 722-728.
10. Meki, A.-R.M.A.; Saleem, T.H.; Al-Ghazali, M.H.; Sayed, A.A. Interleukins -6, -8 and -10 and tumor necrosis factor-alpha and its soluble receptor I in human milk at different periods of lactation. *Nutr. Res.* **2003**, *23*, 845-855.
11. Filteau, S.M.; Lietz, G.; Mulokozi, G.; Bilotta, S.; Henry, C.J.K.; Tomkins, A.M. Milk cytokines and subclinical breast inflammation in Tanzanian women: effects of dietary red palm oil or sunflower oil supplementation. *Immunology* **1999**, *97*, 595-600.
12. Erbağcı, A.B.; Çekmen, M.B.; Balat, Ö.; Balat, A.; Aksoy, F.; Tarakçioğlu, M. Persistency of high proinflammatory cytokine levels from colostrum to mature milk in preeclampsia. *Clin. Biochem.* **2005**, *38*, 712-716.
13. Teixeira, L.K.; Fonseca, B.P.; Barboza, B.A.; Viola, J.P. The role of interferon-g on immune and allergic responses. *Memórias do Instituto Oswaldo Cruz* **2005**, *100*, 137-144.
14. Tang, M.L.K.; Kemp, A.S.; Hill, D.J.; Thorburn, J. Reduced interferon- $\gamma$  secretion in neonates and subsequent atopy. *The Lancet* **1994**, *344*, 983-985.
15. Kon, I.Y.; Shilina, N.M.; Gmshinskaya, M.V.; Ivanushkina, T.A. The Study of Breast Milk IGF-1, Leptin, Ghrelin and Adiponectin Levels as Possible Reasons of High Weight Gain in Breast-Fed Infants. *Ann. Nutr. Metab.* **2014**, *65*, 317-323.
16. Alasmar, R.M.; Varadharajan, K.; Shanmugakonar, M.; Al-Naemi, H.A. Gut Microbiota and Health: Understanding the Role of Diet. *Food and Nutrition Sciences* **2019**, *Vol.10No.11*, 29.
17. Penttila, I. Effects of transforming growth factor-beta and formula feeding on systemic immune responses to dietary beta-lactoglobulin in allergy-prone rats. *Pediatr. Res.* **2006**, *59*, 650-655.
18. Laiho, K.; Lampi, A.M.; Hamalainen, M.; Moilanen, E.; Piironen, V.; Arvola, T.; Syrjanen, S.; Isolauri, E. Breast milk fatty acids, eicosanoids, and cytokines in mothers with and without allergic disease. *Pediatr. Res.* **2003**, *53*, 642-647.
19. Collado, M.C.; Laitinen, K.; Salminen, S.; Isolauri, E. Maternal weight and excessive weight gain during pregnancy modify the immunomodulatory potential of breast milk. *Pediatric Research* **2012**, *72*, 77-85.
20. Snijders, B.E.P.; Damoiseaux, J.; Penders, J.; Kummeling, I.; Stelma, F.F.; van Ree, R.; van den Brandt, P.A.; Thijs, C. Cytokines and soluble CD14 in breast milk in relation with atopic manifestations in mother and infant (KOALA Study). *Clin. Exp. Allergy* **2006**, *36*, 1609-1615.
